# Supplementary material for: Natural small molecule FMHM inhibits lipopolysaccharide-induced inflammatory response by promoting TRAF6 degradation via K48-linked polyubiquitination
Source: PubMed Central journal article supplement (PMC4589686; doi:10.1038/srep14715), 2015-10-01
Supplement: srep14715-s1.pdf [file srep14715-s1.pdf]

## **Supporting Information**

# **Natural small molecule FMHM inhibits lipopolysaccharide-induced inflammatory response by promoting TRAF6 degradation via K48-linked polyubiquitination**

**Ke-Wu Zeng<sup>1</sup>, Li-Xi Liao<sup>1</sup>, Hai-Ning Lv<sup>1</sup>, Jiao-Fang Song<sup>2</sup>, Qian Yu<sup>2</sup>, Xin Dong<sup>1</sup>, Jun Li<sup>3</sup>, Yong Jiang<sup>1</sup>, Peng-Fei Tu<sup>1,\*</sup>**

<sup>1</sup>State Key Laboratory of Natural and Biomimetic Drugs, School of Pharmaceutical Sciences, Peking University, Beijing 100191, China

<sup>2</sup>Research Studio of Integration of Traditional and Western Medicine, First Hospital, Peking University, Beijing 100034, China

<sup>3</sup>Modern Research Center for Traditional Chinese Medicine, Beijing University of Chinese Medicine, Beijing 100029, China

**Figure S1**

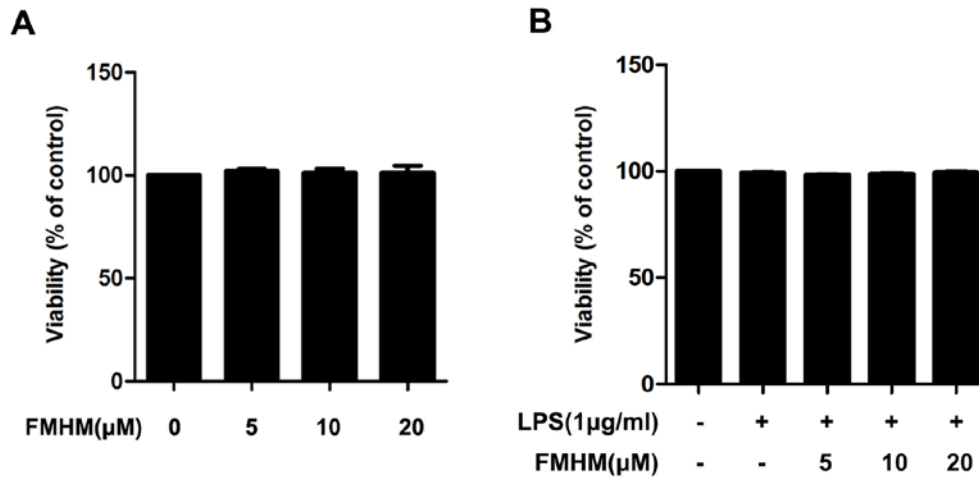

**Figure S2**

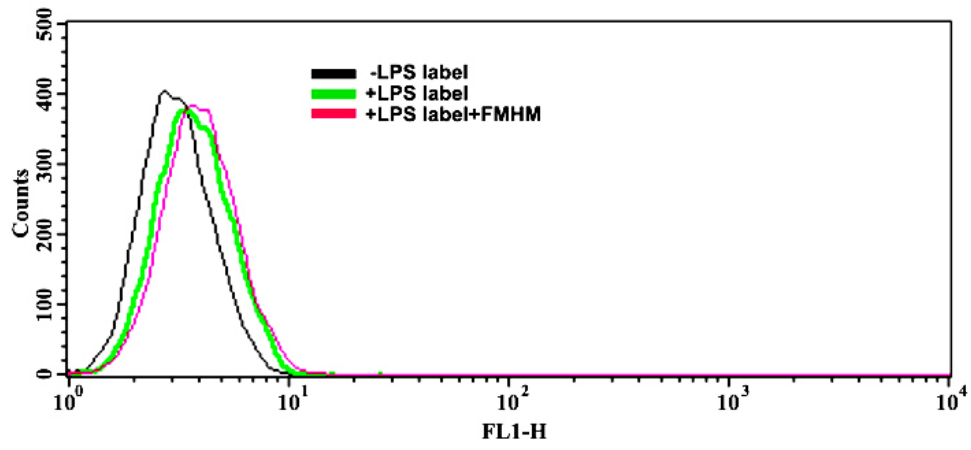

# Figure S3

A

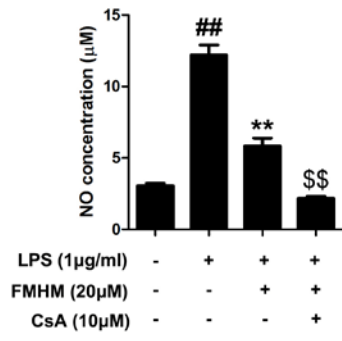

B

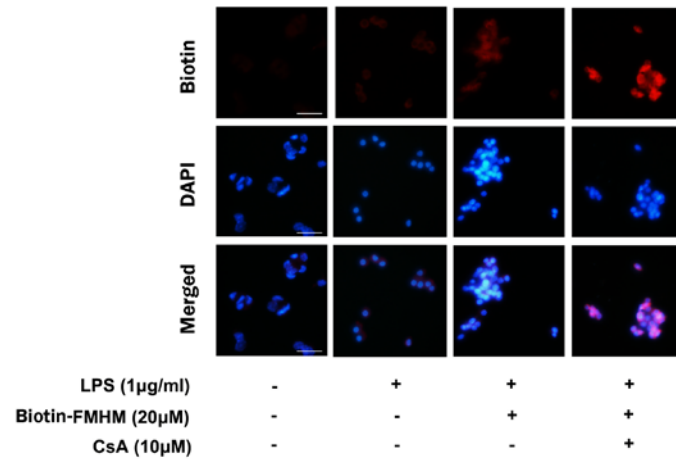

**Figure S4**

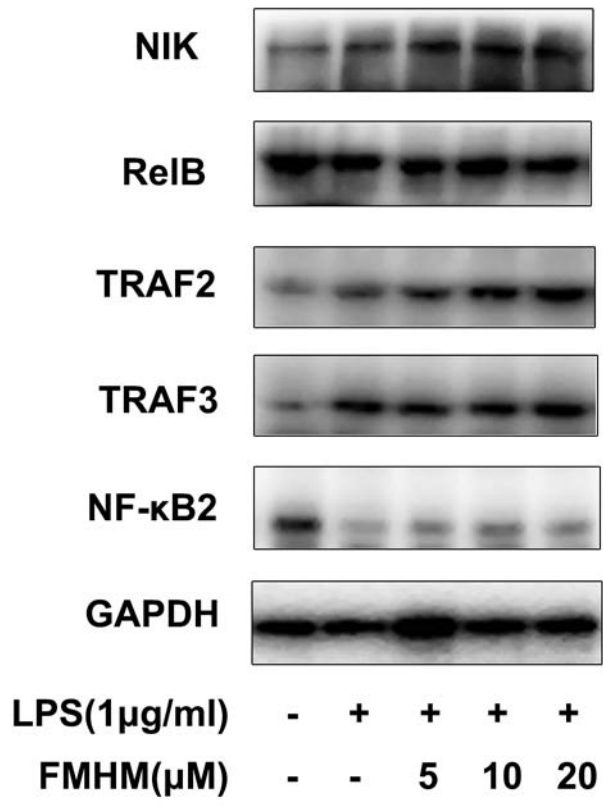

**Figure S5**

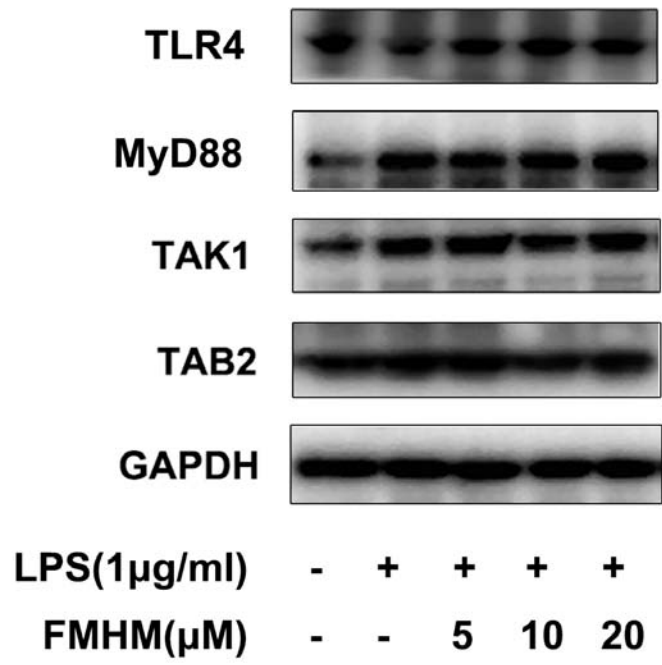

**Figure S6**

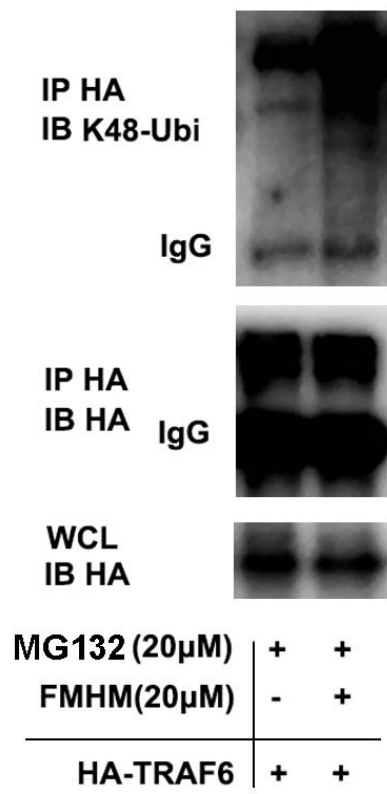

**Figure S7**

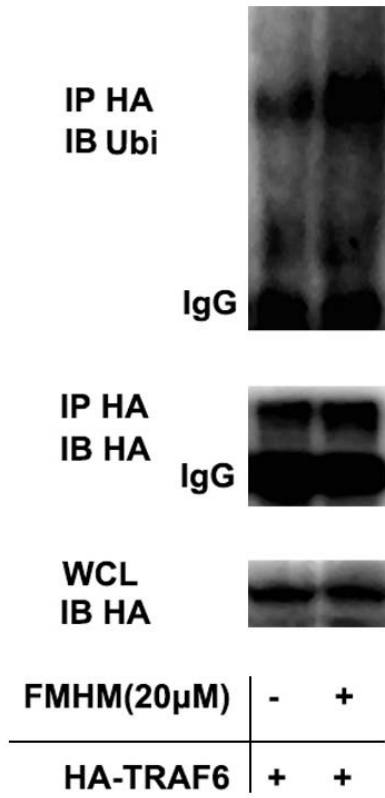



**Figure S8**

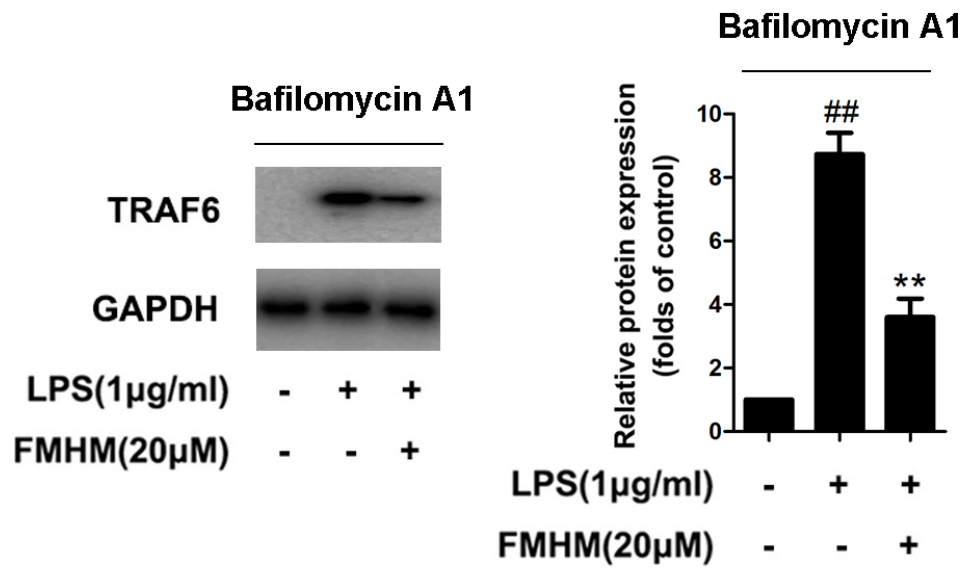

## Figure legends

**Supplement Figure S1.** FMHM did not show cytotoxicity in RAW264.7 cells. (A) RAW264.7 cells were treated with FMHM (5, 10 and 20  $\mu\text{M}$ ) for 24 h, and then MTT assay was done for viability assay. (B) RAW264.7 cells were treated with FMHM (5, 10 and 20  $\mu\text{M}$ ) in the presence of LPS (1 $\mu\text{g}/\text{mL}$ ) for 24 h, and then MTT assay was done for viability assay. All data are presented as means $\pm$ S.D. from independent experiments performed in triplicate.

**Supplement Figure S2.** FMHM did not interfere LPS-binding to cell surface. RAW264.7 cells were treated with Alexa Fluor488 conjugate LPS (5 $\mu\text{g}/\text{mL}$ ) with or without FMHM (20 $\mu\text{M}$ ) for 1 h. Then mean fluorescence intensity of 10,000 cells for each sample was quantified by flow cytometry. All experiments were performed in triplicate.

**Supplement Figure S3.** (A) Ciclosporin A (CsA) increased the NO inhibitory effects of FMHM. RAW264.7 cells were treated with LPS (1  $\mu\text{g}/\text{mL}$ ) in the absence or presence of FMHM (20  $\mu\text{M}$ ) and CsA (5  $\mu\text{M}$ ) for 24 h, and then NO assay was performed. (B) RAW264.7 cells were treated with Biotin-FMHM (20  $\mu\text{M}$ ) and LPS (1  $\mu\text{g}/\text{mL}$ ) in the presence or the absence of CsA (5  $\mu\text{M}$ ). Then, immunofluorescence assay using anti-biotin antibody (red fluorescence, for FMHM positioning in cells) and DAPI (blue fluorescence, for nuclear positioning in cells) was performed (bar=50 $\mu\text{m}$ ). All data are presented as means $\pm$ S.D. from independent experiments performed in triplicate. <sup>##</sup> $P < 0.01$ , relative to control group; <sup>\*\*</sup> $P < 0.01$ , relative to LPS group; <sup>\$\$</sup> $P < 0.01$ , relative to FMHM group.

**Supplement Figure S4.** FMHM did not regulate non-canonical NF- $\kappa$ B pathway. RAW264.7 cells were treated with LPS (1  $\mu$ g/mL) in the absence or presence of FMHM (5, 10 and 20  $\mu$ M) for 24 h, and then Western blotting assay was performed to detect NIK, RelB, TRAF2, TRAF3 and activated NF- $\kappa$ B2 protein. All experiments were performed in triplicate.

**Supplement Figure S5.** FMHM did not regulate the expressions of TLR4 and adaptor proteins. RAW264.7 cells were treated with LPS (1  $\mu$ g/mL) in the absence or presence of FMHM (5, 10 and 20  $\mu$ M) for 24 h, and then Western blot assay was performed for detection of TLR4, MyD88, TAK2 and TAB2 protein expressions. All experiments were performed in triplicate.

**Supplement Figure S6.** RAW264.7 cells were transfected with HA-tagged TRAF6 plasmids for 72 h, and then treated with MG132 (20  $\mu$ M) in the presence or absence of FMHM (20  $\mu$ M) for 1 h. Co-IP assay was performed to detect K48-linked ubiquitination levels of TRAF6. All experiments were performed in triplicate.

**Supplement Figure S7.** RAW264.7 cells were transfected with HA-tagged TRAF6 plasmids for 72 h, and then treated with FMHM (20  $\mu$ M) for 1 h. Co-IP assay was performed to detect the overall ubiquitination levels of TRAF6. All experiments were performed in triplicate.

**Supplement Figure S8.** RAW264.7 cells were pretreated with Bafilomycin A1 (100 nM) for 4 h, and further treated with FMHM (20  $\mu$ M) in the absence or presence of

LPS (1  $\mu\text{g}/\text{mL}$ ) for 1 h. Western blotting assay was performed to detect TRAF6 protein. All data are presented as means $\pm$ S.D. from independent experiments performed in triplicate. <sup>##</sup> $P < 0.01$ , relative to control group; <sup>\*\*</sup> $P < 0.01$ , relative to LPS group.

### **Primary antibody information**

iNOS (No.#2982, CST company); COX-2 (No.#12282, CST company); GAPDH (No.#2118, CST company); K63-Ubi (No.#5621, CST company); K48-Ubi (No.#8081, CST company); Ubi (No.#3933, CST company); TLR4 (No.#14358, CST company); MyD88 (No.#4283, CST company); TAK1 (No.#5206, CST company); TAB2 (No.#3745, CST company); NF- $\kappa$ B Non-canonical Pathway Antibody Sampler Kit #4888 (NIK, RelB, TRAF2, TRAF3 and NF- $\kappa$ B2); NF- $\kappa$ B Pathway Sampler Kit #9936 (p-IKK $\alpha/\beta$ , IKK $\beta$ , p-I $\kappa$ B, I $\kappa$ B, p-NF- $\kappa$ B, NF- $\kappa$ B); HA (No.#3724, CST company); Myc (No.#2278, CST company); TRAF6 (No.EP591Y, Abcam company).
